# Supplementary material for: Phase Equilibria and Interdiffusion in the Ternary System Epoxy Oligomer–Polysulfone–Alkyl Glycidyl Ether
Source: MDPI journal article supplement (doi:10.3390/polym16010130), 2023-12-30
Supplement: s1 [file s1]

Table S1. Experimental data on the refractive indices of the studied systems.

### Data set

| Refractive index |                 |                 |                 |                 |                 |                 |                |                 |
|------------------|-----------------|-----------------|-----------------|-----------------|-----------------|-----------------|----------------|-----------------|
| T, °C            | PSU             | DGEBA           | AGE             | DGEBA50/AGE50   | DGEBA60/AGE40   | DGEBA55/AGE45   | DGEBA50/PSU50  | DGEBA55/PSU45   |
| 20               | 1.6341 ± 0.0005 | 1.5752 ± 0.0005 | 1.4504 ± 0.0005 | 1.5145 ± 0.0005 | 1.5241 ± 0.0005 | 1.52 ± 0.0005   | 1.62 ± 0.0005  | 1.616 ± 0.0005  |
| 40               | 1.6321 ± 0.0005 | 1.5652 ± 0.0005 | 1.4424 ± 0.0005 | 1.5059 ± 0.0005 | 1.5142 ± 0.0005 | 1.5098 ± 0.0005 | 1.612 ± 0.0005 | 1.6086 ± 0.0005 |
| 60               | 1.6301 ± 0.0005 | 1.5552 ± 0.0005 | 1.4344 ± 0.0005 | 1.4976 ± 0.0005 | 1.5055 ± 0.0005 | 1.5009 ± 0.0005 | 1.604 ± 0.0005 | 1.5997 ± 0.0005 |
| 80               | 1.6281 ± 0.0005 | 1.5452 ± 0.0005 | 1.4264 ± 0.0005 | 1.4888 ± 0.0005 | 1.4971 ± 0.0005 | 1.4921 ± 0.0005 | 1.596 ± 0.0005 | 1.5929 ± 0.0005 |
| 100              | 1.6351 ± 0.0005 | 1.5352 ± 0.0005 | 1.4184 ± 0.0005 | 1.4802 ± 0.0005 | 1.4892 ± 0.0005 | 1.4837 ± 0.0005 | 1.588 ± 0.0005 | 1.5833 ± 0.0005 |
| 120              | 1.6241 ± 0.0005 | 1.5252 ± 0.0005 | 1.4104 ± 0.0005 | 1.4719 ± 0.0005 | 1.4821 ± 0.0005 | 1.4761 ± 0.0005 | 1.58 ± 0.0005  | 1.5756 ± 0.0005 |

Table S2-7. Experimental data on the compositions of the coexisting phases of the studied systems.

### Phase diagrams of bicomponent systems

| PSU-AGE |                     |                     |                     |                     |
|---------|---------------------|---------------------|---------------------|---------------------|
| T, °C   | Left                |                     | Right               |                     |
|         | $\Phi_{\text{PSU}}$ | $\Phi_{\text{AGE}}$ | $\Phi_{\text{PSU}}$ | $\Phi_{\text{AGE}}$ |
| 40      | $0.09 \pm 0.015$    | $0.91 \pm 0.015$    | $0.99 \pm 0.015$    | $0.01 \pm 0.005$    |
| 60      | $0.11 \pm 0.015$    | $0.89 \pm 0.015$    | $0.99 \pm 0.015$    | $0.01 \pm 0.005$    |
| 80      | $0.13 \pm 0.015$    | $0.87 \pm 0.015$    | $0.99 \pm 0.015$    | $0.01 \pm 0.005$    |
| 100     | $0.16 \pm 0.014$    | $0.84 \pm 0.014$    | $0.99 \pm 0.014$    | $0.01 \pm 0.005$    |
| 120     | $0.18 \pm 0.014$    | $0.82 \pm 0.014$    | $0.99 \pm 0.014$    | $0.01 \pm 0.005$    |
| 140     | $0.20 \pm 0.014$    | $0.80 \pm 0.014$    | $0.99 \pm 0.014$    | $0.01 \pm 0.005$    |
| 160     | $0.22 \pm 0.013$    | $0.78 \pm 0.013$    | $0.98 \pm 0.013$    | $0.02 \pm 0.01$     |
| 180     | $0.23 \pm 0.013$    | $0.77 \pm 0.013$    | $0.98 \pm 0.013$    | $0.02 \pm 0.01$     |

| PSU-DGEBA50/AGE50 |                     |                               |                     |                               |
|-------------------|---------------------|-------------------------------|---------------------|-------------------------------|
| T, °C             | Left                |                               | Right               |                               |
|                   | $\Phi_{\text{PSU}}$ | $\Phi_{\text{DGEBA50/AGE50}}$ | $\Phi_{\text{PSU}}$ | $\Phi_{\text{DGEBA50/AGE50}}$ |
| 40                | $0.2 \pm 0.023$     | $0.8 \pm 0.023$               | $0.98 \pm 0.023$    | $0.02 \pm 0.01$               |
| 60                | $0.29 \pm 0.023$    | $0.71 \pm 0.023$              | $0.98 \pm 0.023$    | $0.02 \pm 0.01$               |
| 80                | $0.33 \pm 0.022$    | $0.67 \pm 0.022$              | $0.98 \pm 0.022$    | $0.02 \pm 0.01$               |
| 100               | $0.36 \pm 0.02$     | $0.64 \pm 0.02$               | $0.98 \pm 0.02$     | $0.02 \pm 0.01$               |
| 120               | $0.38 \pm 0.02$     | $0.615 \pm 0.02$              | $0.98 \pm 0.02$     | $0.02 \pm 0.01$               |
| 140               | $0.40 \pm 0.019$    | $0.59 \pm 0.019$              | $0.98 \pm 0.019$    | $0.02 \pm 0.01$               |
| 160               | $0.44 \pm 0.019$    | $0.56 \pm 0.019$              | $0.98 \pm 0.019$    | $0.02 \pm 0.01$               |

|     |                  |                  |                  |                 |
|-----|------------------|------------------|------------------|-----------------|
| 180 | $0.49 \pm 0.018$ | $0.51 \pm 0.018$ | $0.98 \pm 0.018$ | $0.02 \pm 0.01$ |
|-----|------------------|------------------|------------------|-----------------|

| PSU-DGEBA60/AGE40 |                     |                               |                     |                               |
|-------------------|---------------------|-------------------------------|---------------------|-------------------------------|
| T, °C             | Left                |                               | Right               |                               |
|                   | $\Phi_{\text{PSU}}$ | $\Phi_{\text{DGEBA60/AGE40}}$ | $\Phi_{\text{PSU}}$ | $\Phi_{\text{DGEBA60/AGE40}}$ |
| 40                | $0.33 \pm 0.025$    | $0.67 \pm 0.025$              | $0.95 \pm 0.025$    | $0.05 \pm 0.0025$             |
| 60                | $0.37 \pm 0.024$    | $0.63 \pm 0.025$              | $0.95 \pm 0.025$    | $0.05 \pm 0.0025$             |
| 80                | $0.42 \pm 0.023$    | $0.58 \pm 0.023$              | $0.95 \pm 0.023$    | $0.05 \pm 0.0025$             |
| 100               | $0.46 \pm 0.022$    | $0.54 \pm 0.022$              | $0.94 \pm 0.022$    | $0.06 \pm 0.03$               |
| 120               | $0.49 \pm 0.02$     | $0.51 \pm 0.021$              | $0.92 \pm 0.02$     | $0.08 \pm 0.04$               |
| 136 (UCST)        | $0.74 \pm 0.02$     |                               | $0.026 \pm 0.013$   |                               |

| PSU50/DGEBA50-DGEBA50/AGE50 |                               |                               |                               |                               |
|-----------------------------|-------------------------------|-------------------------------|-------------------------------|-------------------------------|
| T, °C                       | Left                          |                               | Right                         |                               |
|                             | $\Phi_{\text{PSU50/DGEBA50}}$ | $\Phi_{\text{DGEBA50/AGE50}}$ | $\Phi_{\text{PSU50/DGEBA50}}$ | $\Phi_{\text{DGEBA50/AGE50}}$ |
| 40                          | $0.3 \pm 0.028$               | $0.7 \pm 0.028$               | $0.3 \pm 0.028$               | $0.7 \pm 0.028$               |
| 60                          | $0.31 \pm 0.028$              | $0.69 \pm 0.028$              | $0.31 \pm 0.028$              | $0.69 \pm 0.028$              |
| 80                          | $0.32 \pm 0.028$              | $0.68 \pm 0.028$              | $0.32 \pm 0.028$              | $0.68 \pm 0.028$              |
| 100                         | $0.33 \pm 0.028$              | $0.67 \pm 0.028$              | $0.33 \pm 0.028$              | $0.67 \pm 0.028$              |
| 120                         | $0.35 \pm 0.028$              | $0.65 \pm 0.028$              | $0.35 \pm 0.028$              | $0.65 \pm 0.028$              |
| 140                         | $0.37 \pm 0.028$              | $0.63 \pm 0.028$              | $0.37 \pm 0.028$              | $0.63 \pm 0.028$              |
| 160                         | $0.4 \pm 0.028$               | $0.6 \pm 0.028$               | $0.4 \pm 0.028$               | $0.6 \pm 0.028$               |
| 180                         | $0.42 \pm 0.028$              | $0.58 \pm 0.028$              | $0.42 \pm 0.028$              | $0.58 \pm 0.028$              |

| PSU45/DGEBA55-DGEBA55/AGE45 |                               |                               |                               |                               |
|-----------------------------|-------------------------------|-------------------------------|-------------------------------|-------------------------------|
| T, °C                       | Left                          |                               | Right                         |                               |
|                             | $\Phi_{\text{PSU45/DGEBA55}}$ | $\Phi_{\text{DGEBA45/AGE55}}$ | $\Phi_{\text{PSU45/DGEBA55}}$ | $\Phi_{\text{DGEBA45/AGE55}}$ |
| 40                          | $0.34 \pm 0.03$               | $0.66 \pm 0.03$               | $0.04 \pm 0.02$               | $0.96 \pm 0.03$               |
| 60                          | $0.43 \pm 0.03$               | $0.57 \pm 0.03$               | $0.08 \pm 0.03$               | $0.92 \pm 0.03$               |
| 80                          | $0.53 \pm 0.03$               | $0.47 \pm 0.03$               | $0.15 \pm 0.03$               | $0.85 \pm 0.03$               |
| 91 (UCST)                   | $0.69 \pm 0.03$               |                               | $0.31 \pm 0.03$               |                               |

### Ternary phase diagram of system

| T, °C | $\Phi_{AGE}$       | $\Phi_{DGEBA}$     | $\Phi_{PSU}$      |
|-------|--------------------|--------------------|-------------------|
| 40    | $0.085 \pm 0.025$  | 0.000              | $0.915 \pm 0.025$ |
| 40    | $0.1 \pm 0.025$    | $0.1 \pm 0.025$    | $0.8 \pm 0.025$   |
| 40    | $0.132 \pm 0.025$  | $0.198 \pm 0.025$  | $0.67 \pm 0.025$  |
| 40    | $0.38 \pm 0.025$   | $0.57 \pm 0.025$   | $0.05 \pm 0.0025$ |
| 40    | $0.17 \pm 0.025$   | $0.5 \pm 0.025$    | $0.33 \pm 0.025$  |
| 40    | $0.49 \pm 0.025$   | $0.5 \pm 0.025$    | $0.01 \pm 0.005$  |
| 40    | $0.205 \pm 0.025$  | $0.55 \pm 0.025$   | $0.245 \pm 0.025$ |
| 40    | $0.432 \pm 0.025$  | $0.55 \pm 0.025$   | $0.018 \pm 0.025$ |
| 40    | $0.01 \pm 0.005$   | 0.000              | $0.99 \pm 0.025$  |
| 120   | $0.17 \pm 0.023$   | 0.000              | $0.83 \pm 0.023$  |
| 120   | $0.1925 \pm 0.023$ | $0.1925 \pm 0.023$ | $0.615 \pm 0.023$ |
| 120   | $0.204 \pm 0.023$  | $0.306 \pm 0.023$  | $0.49 \pm 0.023$  |
| 120   | $0.364 \pm 0.023$  | $0.546 \pm 0.023$  | $0.09 \pm 0.023$  |
| 120   | $0.265 \pm 0.023$  | $0.5 \pm 0.023$    | $0.235 \pm 0.023$ |
| 120   | $0.485 \pm 0.023$  | $0.5 \pm 0.023$    | $0.015 \pm 0.005$ |
| 120   | $0.01 \pm 0.005$   | 0.000              | $0.99 \pm 0.023$  |
| 180   | $0.23 \pm 0.022$   | 0.000              | $0.77 \pm 0.022$  |
| 180   | $0.245 \pm 0.022$  | $0.245 \pm 0.022$  | $0.51 \pm 0.022$  |
| 180   | $0.35 \pm 0.022$   | $0.5 \pm 0.022$    | $0.15 \pm 0.022$  |
| 180   | $0.455 \pm 0.022$  | $0.5 \pm 0.022$    | $0.045 \pm 0.022$ |
| 180   | $0.48 \pm 0.022$   | $0.48 \pm 0.022$   | $0.04 \pm 0.022$  |
| 180   | $0.02 \pm 0.01$    | 0.000              | $0.98 \pm 0.022$  |
